# Supplementary material for: COVID-19 Associated Thrombotic Thrombocytopenic Purpura: A Case Report and Systematic Review
Source: Preprints.org preprint supplement (doi:10.20944/preprints202206.0424.v1), 2022-06-30
Supplement: Supplementary file 2 [file Supplementary File 2. grading of studies.docx]

| **Table S2. Major** | | | | | | | |
| --- | --- | --- | --- | --- | --- | --- | --- |
| **P. The Joanna Briggs Institute (JBI) Critical Appraisal Checklist for Case Reports (last amended in 2017)**  **Website:** https://joannabriggs.org/critical_appraisal_tools  https://wiki.joannabriggs.org/display/MANUAL/Appendix+7.4+Critical+appraisal+checklist+for+case+reports | | | | | | | |
| Major Components | Response options | | | | | | |
| 1. Were patient’s demographic characteristics clearly described? | Yes | No | | | Unclear | | Not applicable |
| 2. Was the patient’s history clearly described and presented as a timeline? | Yes | No | | | Unclear | | Not applicable |
| 3. Was the current clinical condition of the patient on presentation clearly described? | Yes | No | | | Unclear | | Not applicable |
| 4. Were diagnostic tests or assessment methods and the results clearly described? | Yes | No | | | Unclear | | Not applicable |
| 5. Was the intervention(s) or treatment procedure(s) clearly described? | Yes | No | | | Unclear | | Not applicable |
| 6. Was the post-intervention clinical condition clearly described? | Yes | No | | | Unclear | | Not applicable |
| 7. Were adverse events (harms) or unanticipated events identified and described? | Yes | No | | | Unclear | | Not applicable |
| 8. Does the case report provide takeaway lessons? | Yes | No | | | Unclear | | Not applicable |
| Overall appraisal: Include □ Exclude □ Seek further info □ | | | | | | | |
|  | | | | | | | |
| 10. Were uninterpretable/ intermediate test results reported? (uninterpretable results reported) | | | Yes | No | | Unclear | |
| 11. Were withdrawals from the study explained? (withdrawals explained) | | | Yes | No | | Unclear | |
